# Supplementary material
Source: PubMed Central journal article supplement (PMC10356157)
Supplement: jasn-34-1191-s001.pdf [file jasn-34-1191-s001.pdf]

# Supplemental data

## Supplemental Table of Contents

| Supplemental material | Title                                                                                                                            |
|-----------------------|----------------------------------------------------------------------------------------------------------------------------------|
| Supplemental Table 1  | Primers                                                                                                                          |
| Supplemental Table 2  | List of antibodies and imaging dyes used in this study                                                                           |
| Supplemental Table 3  | Protocol for ligation of guide RNAs                                                                                              |
| Supplemental Table 4  | Protocol for Digestion with BbSI for generating a CRISPR/Cas9 construct for Rab7 KO                                              |
| Supplemental Table 5  | Average injury scores in Rab7 depleted 8-week-old mice                                                                           |
| Supplemental Figure 1 | Rab7 depletion in podocytes in mice results in proteinuria and upregulation of renal injury markers                              |
| Supplemental Figure 2 | Rab7 depletion in podocytes in mice results in podocyte loss                                                                     |
| Supplemental Figure 3 | Additional information: Rab7 KO mice podocytes accumulate unprocessed late-endosome-like vesicles (ULLVS)                        |
| Supplemental Figure 4 | <i>rab7</i> knockdown in <i>Drosophila</i> nephrocytes results in vesicle accumulation                                           |
| Supplemental Figure 5 | RAB7 depletion in podocytes disrupts the fine-tuning of intraluminal acidification                                               |
| Supplemental Figure 6 | Altered Nephrin distribution in podocyte specific Rab7 depleted mice only minor co-localizes with p62/Sqstm1 positive structures |

### Supplemental Table 1: Primers

| Name                 | Use                                              | Species | Sequence (5'-3')         |
|----------------------|--------------------------------------------------|---------|--------------------------|
| GuideRNARAB7humanfw  | Guide RNA forward for CRISPR/Cas9 to target Rab7 | human   | CACCGTTGCTGAAGGTTATCATCT |
| GuideRNARAB7humanrev | Guide RNA reverse for CRISPR/Cas9 to target Rab7 | human   | AAACGGATGATAACCTTCAGCAAC |
| RAB7a humanseqfwd    | Sequencing Primers forward                       | human   | CACCGTTATCATCCTGGGAGATT  |

|                     |                            |       |                         |
|---------------------|----------------------------|-------|-------------------------|
| RAB7a humanseqrev   | Sequencing Primer reverse  | human | AAACGAATCTCCCAGGATGATAA |
| Serpine1 (Pai1) fwd | Forward primer for RT-qPCR | mouse | CACAGGCACTGCAAAAGGTC    |
| Serpine1 (Pai1) rev | Reverse primer for RT-qPCR | mouse | GGATTGTCTCTGTCTGGGTTGT  |
| Lcn2 fwd            | Forward primer for RT-qPCR | mouse | ACGGACTACAACCAGTTTCGC   |
| Lcn2 rev            | Reverse primer for RT-qPCR | mouse | AATGCATTGGTCGGTGGGG     |
| Gapdh fwd           | Forward primer for RT-qPCR | mouse | CCTGGAGAAACCTGCCAAGTA   |
| Gapdh rev           | Reverse primer for RT-qPCR | mouse | AAGTCGCAGGAGACAACCTG    |
| Ccl2 fwd            | Forward primer for RT-qPCR | mouse | AGCTGTAGTTTTTGTACCAAGC  |
| Ccl2 rev            | Reverse primer for RT-qPCR | mouse | TGCTTGAGGTGGTTGTGGAA    |

### Supplemental Table 2: List of antibodies and imaging dyes used in this study.

WB= used in Western blot analysis, IF= used in immunofluorescence staining

| Antigen                                    | Species    | Provider                                      | Working Dilution           |
|--------------------------------------------|------------|-----------------------------------------------|----------------------------|
| Lamp1                                      | Rabbit     | OriGene Technologies Inc.                     | 1:1000 (WB)                |
| LAMP1                                      | Rabbit     | 46843 Cell Signaling                          | 1:300                      |
| Lamp2a H4B4                                | Mouse      | Santa Cruz Biotechnology, Heidelberg          | 1:1000 (WB),<br>1:100 (IF) |
| LC3B                                       | Mouse      | Medical & Biological laboratories Co., LTD.   | 1:1000 (WB)                |
| Sequestosome-1 p62                         | Mouse      | BD Biosciences, Franklin Lakes, NJ, USA       | 1:1000 (WB)                |
| Sequestosome-1 P62                         | Guinea pig | Progene                                       | 1:1000(WB)                 |
| SQSTM1/p62                                 | Rabbit     | 23214, Cell Signaling                         | 1:100 (IF)                 |
| SYNPO (Synaptopodin)                       | Mouse      | 65194, Progene                                | 1:200 (IF)                 |
| Rab7                                       | Rabbit     | Cell Signaling Technology, Inc., Danvers, USA | 1:1000 (WB)                |
| Rab7                                       | Rabbit     | Santa Cruz Biotechnology, Heidelberg          | 1:1000 (WB)                |
| Rab7                                       | Rabbit     | ab137029, Abcam                               | 1:150 (IF)                 |
| Nephrin                                    | guinea pig | Progen                                        | 1:100 (IHC),<br>1:500 (WB) |
| RILP                                       | Rabbit     | Abcam                                         | 1:1000 (WB)                |
| WT1                                        | Rabbit     | ab15249, Abcam                                | 1:200 (IF)                 |
| V1G1                                       | Mouse      | Santa Cruz Biotechnology, Heidelberg          | 1:250 (WB)                 |
| A-Actinin4                                 | Rabbit     | Enzo Life Sciences GmbH, Lörrach              | 1:1000 (WB)                |
| B-Tubulin                                  | Mouse      | Sigma-Aldrich Chemie GmbH, Munich             | 1:1000 (WB)                |
| Alexa Fluor 488 conjugated alpha-mouse IgG | Goat       | Invitrogen Life Technologies GmbH, Darmstadt  | 1:1000                     |

|                                                |      |                                                                   |             |
|------------------------------------------------|------|-------------------------------------------------------------------|-------------|
| Alexa Fluor 488 conjugated alpha-Rabbit IgG    | Goat | Invitrogen Life Technologies GmbH, Darmstadt                      | 1:1000 (IF) |
| Alexa Fluor 594 conjugated alpha-mouse IgG     | Goat | Invitrogen Life Technologies GmbH, Darmstadt                      | 1:1000 (IF) |
| Alexa Fluor 594 conjugated alpha-Rabbit IgG    | Goat | Invitrogen Life Technologies GmbH, Darmstadt                      | 1:1000 (IF) |
| Alexa Fluor 594 conjugated phalloidin          | -    | Invitrogen Life Technologies GmbH, Darmstadt                      | 1:300 (IF)  |
| DAPI (4',6-diamidine-2-phenylindole)           | -    | Invitrogen Life Technologies GmbH, Darmstadt                      | 1:5000 (IF) |
| Hoechst 33342 trihydrochloride, trihydrate     | -    | Thermo Scientific Inc., Waltham, USA                              | 10mg/ml     |
| HRP-conjugated alpha-mouse IgG                 | Goat | Jackson Immunoresearch Laboratories, Inc., Suffolk, Great Britain | 1:1000 (WB) |
| HRP-conjugated alpha-Rabbit IgG                | Goat | Jackson Immunoresearch Laboratories, Inc., Suffolk, UK            | 1:1000 (WB) |
| LysoTracker green DND-26                       | -    | Thermo Scientific Inc., Waltham, USA                              | 50 nM       |
| LysoTracker Red                                | -    | Thermo Scientific Inc., Waltham, USA                              | 50 nM       |
| Wheat germ agglutinin texas red tm x-conjugate | -    | Thermo Scientific Inc., Waltham, USA                              | 1 mg/ml     |
| PageRuler Plus Prestained Protein Ladder       | -    | Thermo Scientific Inc., Waltham, USA                              |             |

**Supplemental Table 3: Components for ligation of guide RNAs.**

| Reagent               | Amount   |
|-----------------------|----------|
| Guide RNA fw & rev    | 8µl each |
| 10x PNK buffer        | 2µl      |
| 5mM ATP               | 1µl      |
| Polynucleotide kinase | 1µl      |

**Supplemental Table 4: Components for Digestion with BbSI for generating a CRISPR construct for Rab7 KO.**

| Reagent                                | Amount |
|----------------------------------------|--------|
| Px330-459 plasmid                      | 50 ng  |
| Annealed PCR product (Suppl. Table. 2) | 0,5 µl |
| 10x T4 Ligation Buffer                 | 1 µl   |
| <i>BbSI</i>                            | 0,5 µl |
| T4 Ligase                              | 0,5 µl |
| H <sub>2</sub> O                       | 6,5 µl |
| 5 min 37 °C, 5min 23 °C for 30x cycles |        |

**Supplemental Table 5: Average injury scores in 8-week-old Rab7 depleted mice.**

Analysis was done from paraffin sections. 0 = < 5 %; 1 = 5-25 %; 2 = 25-50 %; 3 = >50 %; N= 5, Statistical analysis was performed by Mann Whitney test with \*\*p =0.0079

|                           | Cntr [average score] | KO [average score] |
|---------------------------|----------------------|--------------------|
| Interstitial fibrosis     | 0                    | 1.2**              |
| Tubular atrophy           | 0                    | 1.4 **             |
| Interstitial inflammation | 0                    | 1**                |
| Proteinaceous casts       | 0                    | 2.8**              |

## Supplemental Figures and Legends

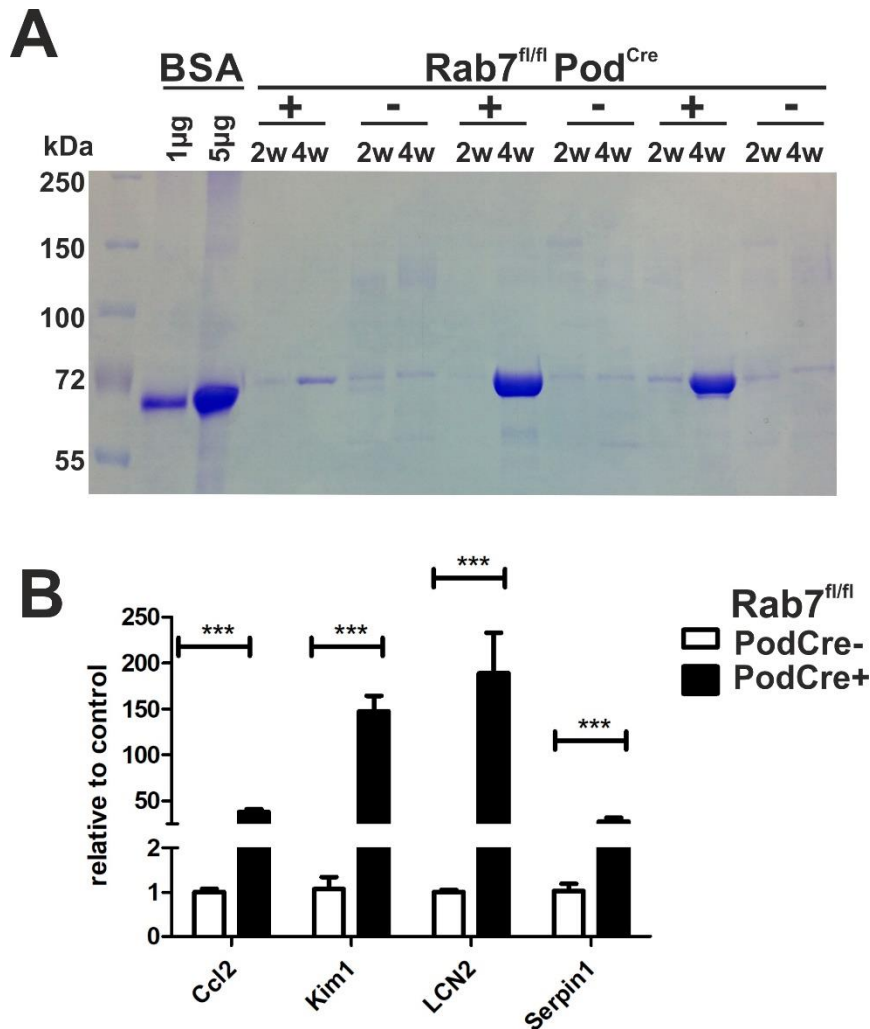

Supplemental Figure 1: Rab7 depletion in podocytes in mice results in proteinuria and upregulation of renal injury markers.

(A) SDS-PAGE with Coomassie staining of urines of Rab7<sup>fl/fl</sup>;PodCre<sup>+</sup> and control mice to detect proteinuria. The samples were respectively collected from the same animal at 2 and 4 weeks of age from a total of 3 mice per group. As control, a standard BSA concentration of 1 and 5 µg was used. N=3. (B) Total RNA was isolated and analyzed by qPCR. Rab7<sup>fl/fl</sup>;Pod-Cre<sup>+</sup> mice show increasing injury markers at 8 weeks after birth. Shown is Mean with SEM, \*\*\* p<0.0001 in a two-way ANOVA, N=4.

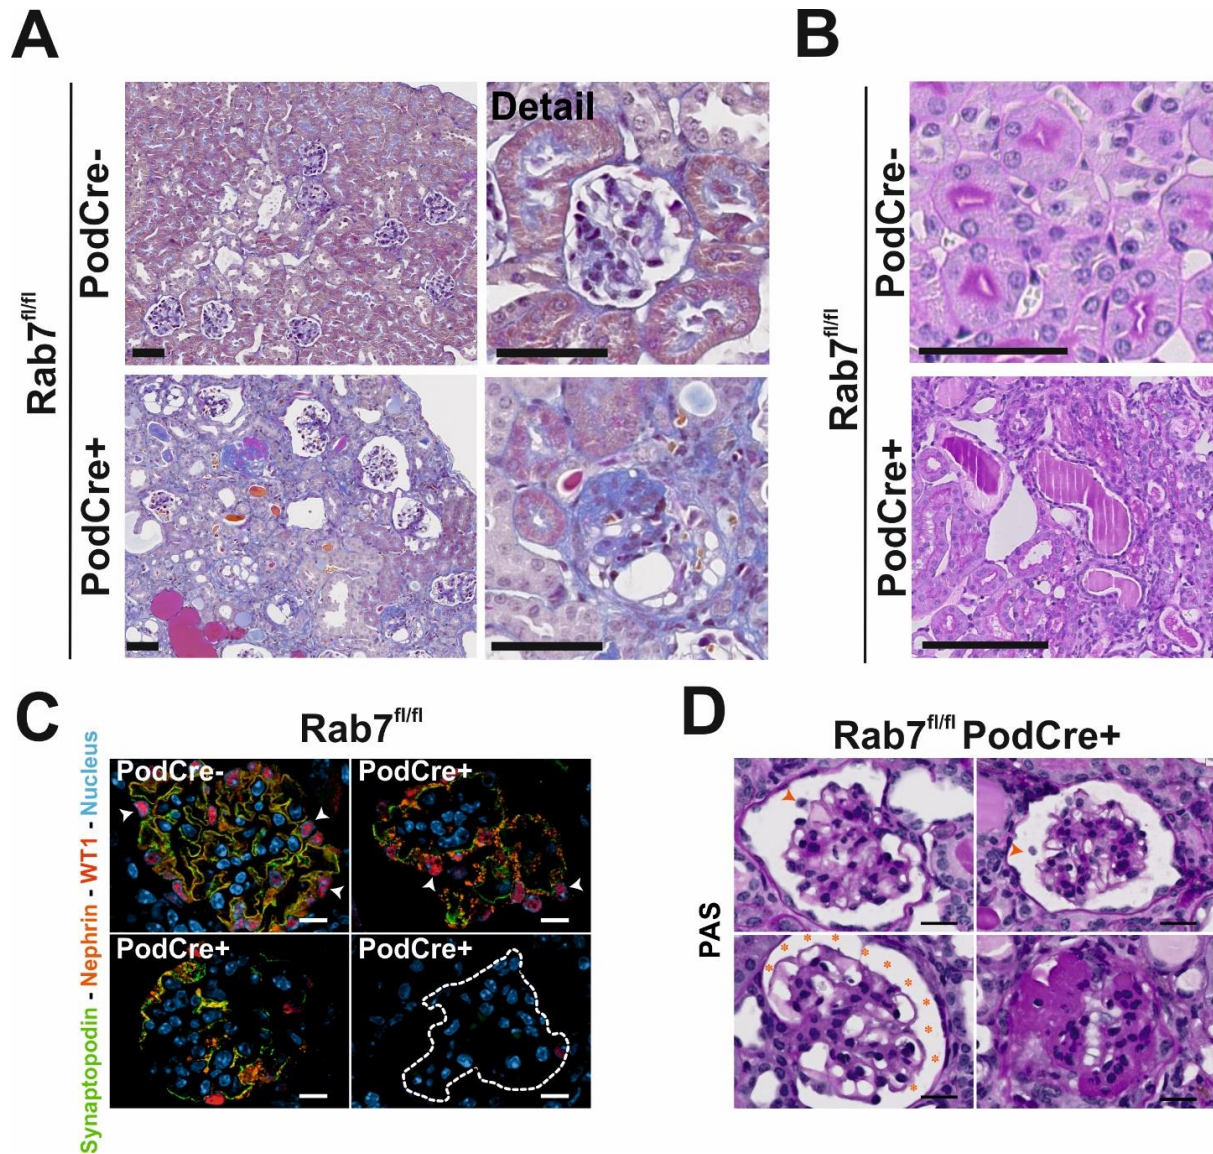

Supplemental Figure 2: Rab7 depletion in podocytes leads to podocyte loss.

(A) SFGO staining of 8-week-old kidney paraffin sections. Rab7<sup>fl/fl</sup>;PodCre<sup>+</sup> mice show dilated Bowman's space and global interstitial fibrosis. Quantification is added in Suppl. Tab. ST5. Scale bar 50  $\mu$ m (B) PAS staining of 8-week-old kidney cryosections of Rab7<sup>fl/fl</sup>;PodCre<sup>+</sup> and control mice with the focus on proteinaceous casts, Scale bar 50  $\mu$ m. The quantification is shown in Suppl. Table ST5. (C/D) Podocyte depletion in Rab7<sup>fl/fl</sup>;PodCre<sup>+</sup> and control mice by immunofluorescence and PAS staining, (C) spectrum of podocyte depletion from representative glomeruli in Rab7<sup>fl/fl</sup>;PodCre<sup>+</sup> animals, white arrowheads indicate representative podocyte nuclei. Dashed line indicates glomerular tuft area. (D) Spectrum of podocyte depletion from representative glomeruli in Rab7 KO animals. (upper left) Orange arrow indicates podocyte cell body bulging/detachment into the urinary space; (upper right) orange arrowhead indicates free floating/detached cell in the urinary space; (lower left) orange asterisks indicate glomerular capillaries without visible podocyte nuclei; (lower right) fully sclerosed glomerulus and concomitant podocyte depletion.

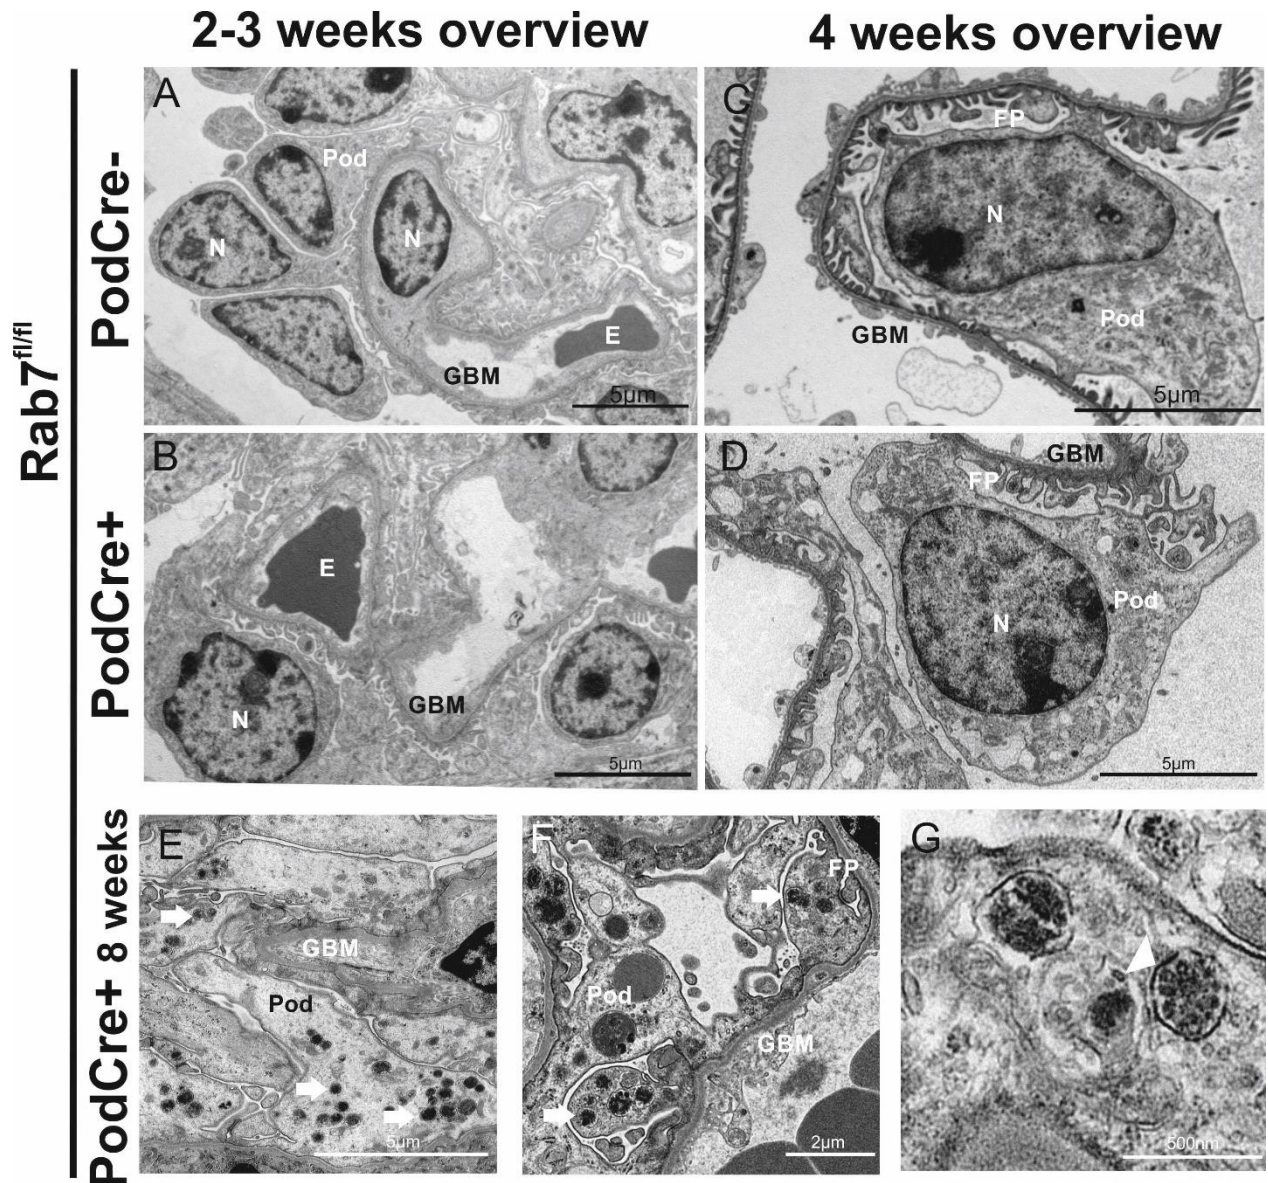

Supplemental Figure 3: Additional information: Rab7 KO mice podocytes accumulate unprocessed late-endosome-like vesicles (ULLVS).

(A/B) Ultrastructural analyses: TEM images of 2-3-week-old mice. The SD is still intact in *Rab7<sup>fl/fl</sup>;PodCre<sup>+</sup>* mice. (C/D) TEM images of 4-week-old mice. The GBM looks slightly thickened and FPE with disruption of the SD is partly detectable. (E/F) TEM images: Detailed view of the accumulating vesicles in 8-week-old *Rab7<sup>fl/fl</sup>;PodCre<sup>+</sup>* mice. Accumulating ULLVs are spread throughout the podocyte (white arrow). The appearance of accumulating vesicles did not change during disease progression; we still observed large single membrane vesicles composed of intraluminal vesicles (white arrows). (G) TEM images: Higher magnification of the ULLV structures found in podocytes. Pod = podocyte; GBM = glomerular basement membrane; N = nucleus; B = blood vessel; FP = foot process.

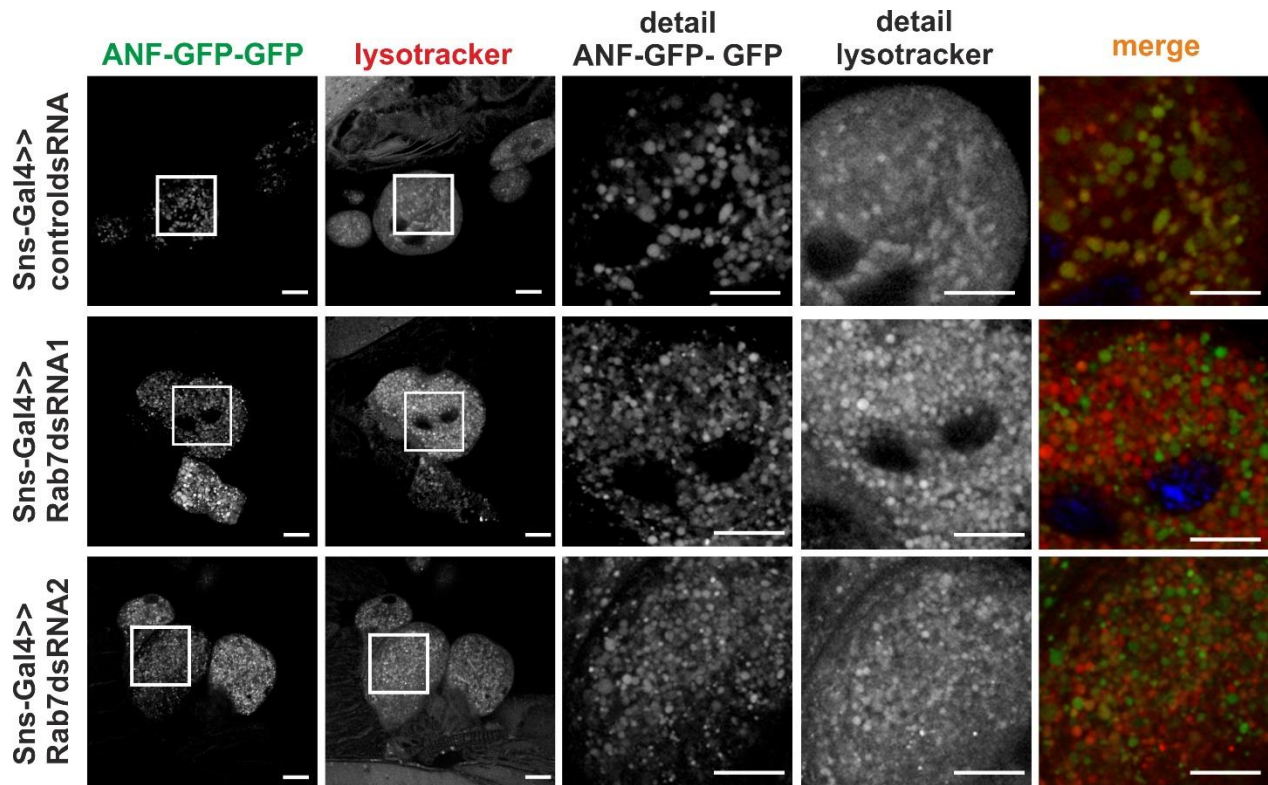

Supplemental Figure 4: Rab7 knockdown in *Drosophila* nephrocytes results in vesicle accumulation.

Uptake of secreted ANF-GFP-GFP into nephrocytes. Shown are prepared control (*dsRNA* for Or83b) and Rab7 knockdown nephrocytes (*dsRNA1* and *2*) showing an accumulation of ANF-GFP-GFP in Rab7 knockdown nephrocytes. Acidic compartments were stained with LysoTracker Red. Knockdown in nephrocytes was accomplished by employing *Sns-Gal4*. Zoom-in images are shown to the right. Scale bar: 10  $\mu$ m. N=3.



**A** RAB7 *homo sapiens* Chromosome 3

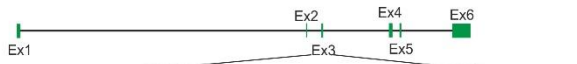

CS  
 WT : TTCAGCAATCAGTACAAAGCCACAAT AGGAGCTGACTTTCTGAC  
 KO1: TTCAGCAATCAGTACAAAGCCACAA- AGGAGCTGACTTTCTGAC  
 KO2: TTCAGCAATCAGTACAAAGCCACAATTAGGAGCTGACTTTCTGAC  
 KO3: TTCAGCAATCAGTACAAAG-----GAGCTGACTTTCTGAC

PS  
 WT : F S N Q Y K A T I G A D F L T  
 KO1: F S N Q Y K A T K E L T F \* P  
 KO2: F S N Q Y K A T I R S \* L S D  
 KO3: F S N Q Y K G A D F L T K E V

**B**

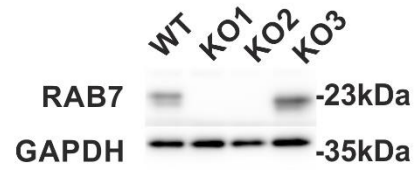

**C** KO1 KO3

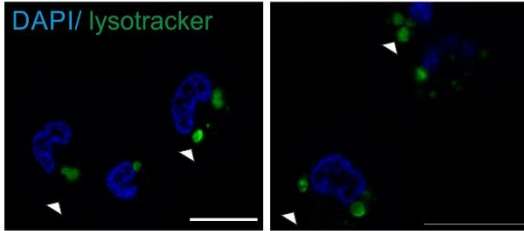

**E**

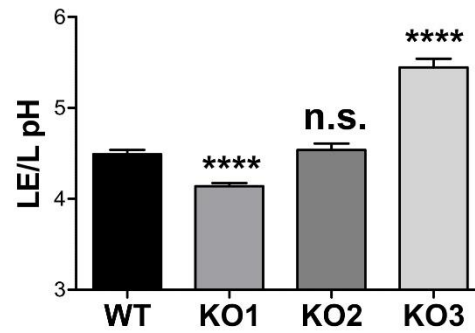

**D** WT

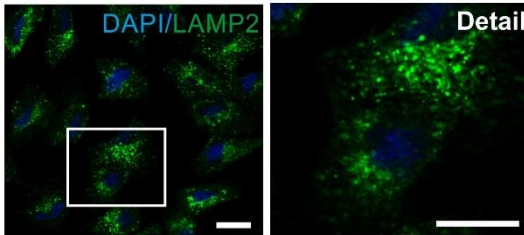

**D** KO1

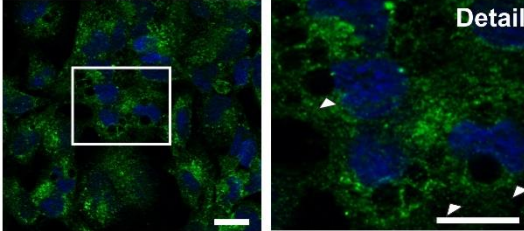

**D** KO2 KO3

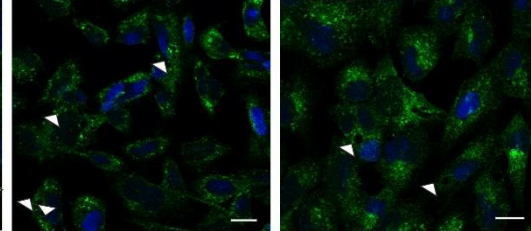

**F** WT KO1 KO2 KO3

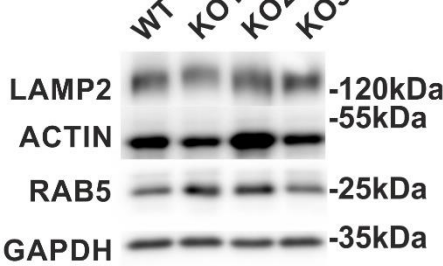

**G**

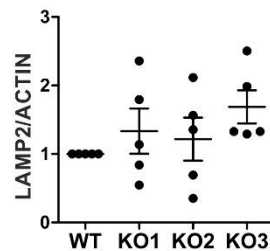

**H**

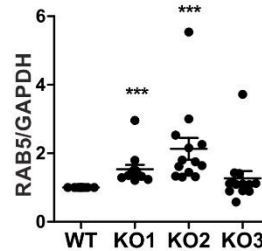

**I** WT KO1 KO2 KO3

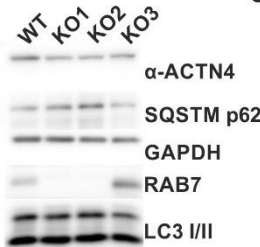

**J**

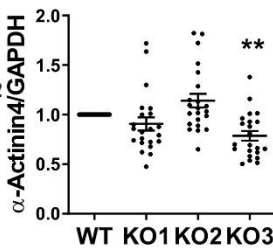

**K**

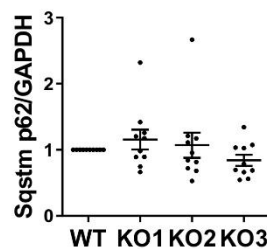

**L**

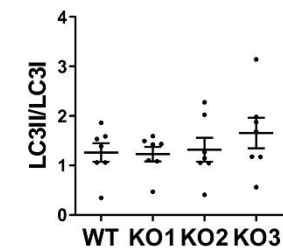

**Supplemental Figure 5: RAB7 depletion in podocytes disrupts the fine-tuning of intraluminal acidification.**

**(A)** RAB7 editing confirmation by sequencing in three *CRISPR/Cas9*-edited clones with different protein sequences. Clone 1 and 2 exhibited frameshift mutations, while clone 3 contained a deletion of 3 amino acids. AS: coding DNA sequence, PS: amino acids sequence **(B)** RAB7 expression was detected by Western blotting. As clone KO3 showed an in-frame deletion, its expression is recognized by anti Rab7 antibodies in WB analyses. GAPDH served as loading control. **(C/D)** Images of WT and RAB7 KO cell lines. Cells were stained by the live cell tracker LysoTracker green (C). The RAB7 depleted human podocyte cell lines 1 and 3 show enlarged LysoTracker positive vesicles. (D) Additional immunofluorescence staining with anti-Lamp2 for cell line 2 and 3. N=3 Immunofluorescence analyses using with antibodies against LAMP2 reveals huge LAMP2-positive vesicles in RAB7 depleted cell lines (white arrowheads); Scale bar 20  $\mu\text{m}$ . **(E)** Determination of the lysosomal pH by dextrans attached to pH sensitive dyes as described before by Canton and Grinstein [25]. LE = late endosomes, L = lysosomes, shown is mean with SEM; \*\*\* $p < 0.0001$  in a Kruskal- Wallis test, N=2.

**(F-H)** Western blot analysis shows that LAMP2 expression is not significantly altered in Rab7 KO lines. The expression of the early endosome marker RAB5 is slightly increased in Rab7 KO cell lines 1 and 2. Blots were quantified from at least 3 independent experiments and normalized to GAPDH and ACTIN and the control cell line. N>3.

**(I-L)** Western blots: Autophagy markers were detected by WB using antibodies against Rab7, p62/Sqstm1, LC3I/II.  $\alpha$ -Actinin-4 and GAPDH served as loading controls. P62 was slightly upregulated in RAB7 KO cell lines 1 and 2 and downregulated in cell line 3. The LC3II/LC3I ratio was determined and does not show changes in cell line 1 and 2 but an increase in cell line 3. Quantification was done from at least three independent experiments.

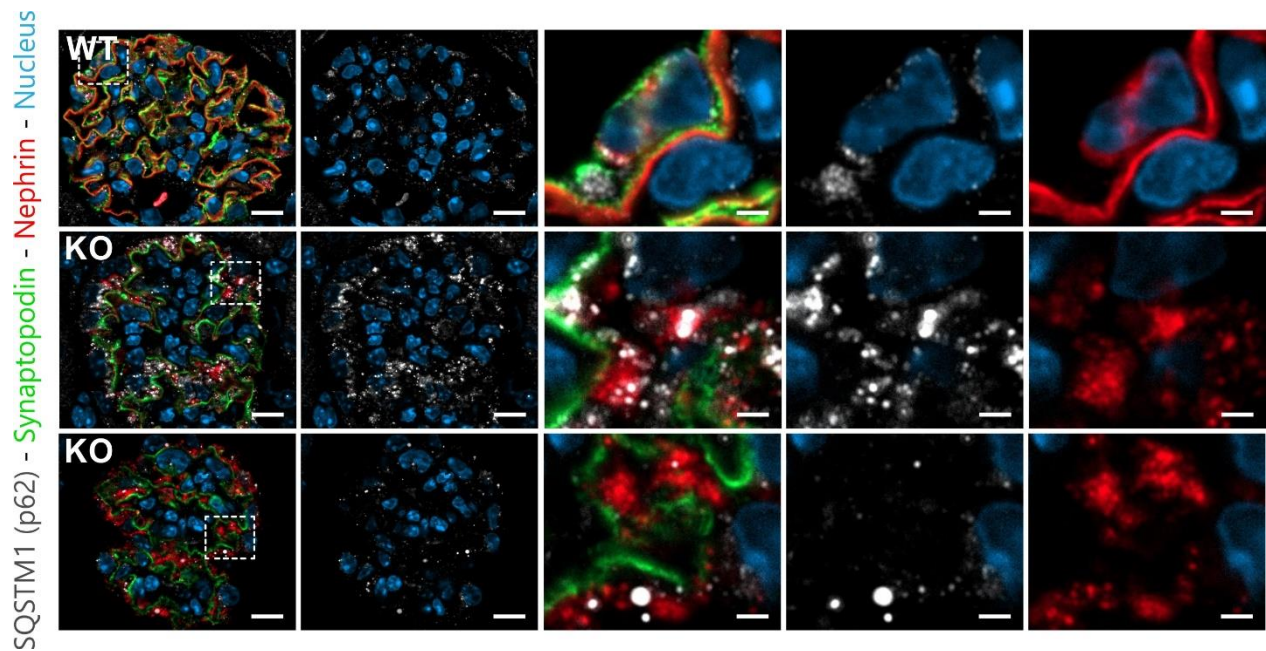

**Supplemental Figure 6: Altered nephrin distribution in podocyte-specific Rab7 depleted mice only minorly co-localizes with p62/ Sqstm1 positive structures.**

Images show p62/Sqstm1 distribution in glomeruli of 8- week old WT control and  $Rab7^{fl/fl};PodCre+$  mice. Nephrin (red), Synaptopodin (Synpo, green), and Nuclei (Dapi, blue) were stained as co-marker. Nephrin staining shows a vesicular like pattern and translocation towards the podocyte cell body apical of Synpo in KO animals. Synpo shows intact localization to the basolateral podocyte compartment. Analysis of Sqstm1 shows enriched signals in some glomeruli of  $Rab7^{fl/fl};PodCre+$  mice, but only minor co-localization with Nephrin positive structures. P61/Sqstm1 signals had a wide spectrum in expression levels when comparing several glomeruli.
